# Supplementary material
Source: PubMed Central journal article supplement (PMC3254104)
Supplement: NIHMS323358-supplement-01.pdf [file NIHMS323358-supplement-01.pdf]

## **SUPPLEMENTAL MATERIAL**

Supplemental Figure 1. EDD spectrum of T1 [M-5H+1Na]<sup>4-</sup>.

Supplemental Figure 2. IRMPD spectrum of T1 [M-5H+1Na]<sup>4-</sup>.

Supplemental Figure 3. EDD spectrum of T2 [M-5H+2Na]<sup>3-</sup>.

Supplemental Figure 4. IRMPD spectrum of T2 [M-5H+2Na]<sup>3-</sup>.

Supplemental Figure 5. EDD spectrum of T2 [M-5H+3Na]<sup>2-</sup>.

Supplemental Figure 6. IRMPD spectrum of T2 [M-5H+3Na]<sup>2-</sup>.

Supplemental Tables 1-6. Mass-to-charge, intensity, and assignment lists for the six supplemental figures.

**Supplemental Figure 1.** EDD spectrum of T1  $[M-5H+1Na]^4$ .

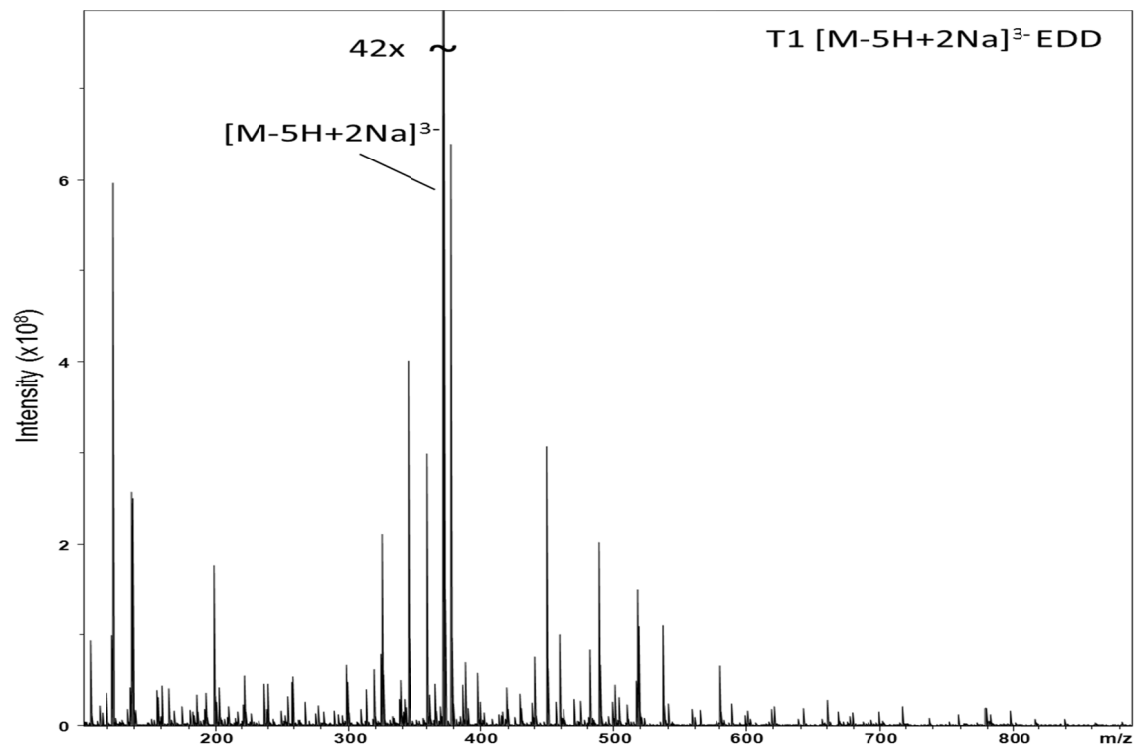

Supplemental Figure 2. IRMPD spectrum of T1  $[M-5H+1Na]^{4-}$ .

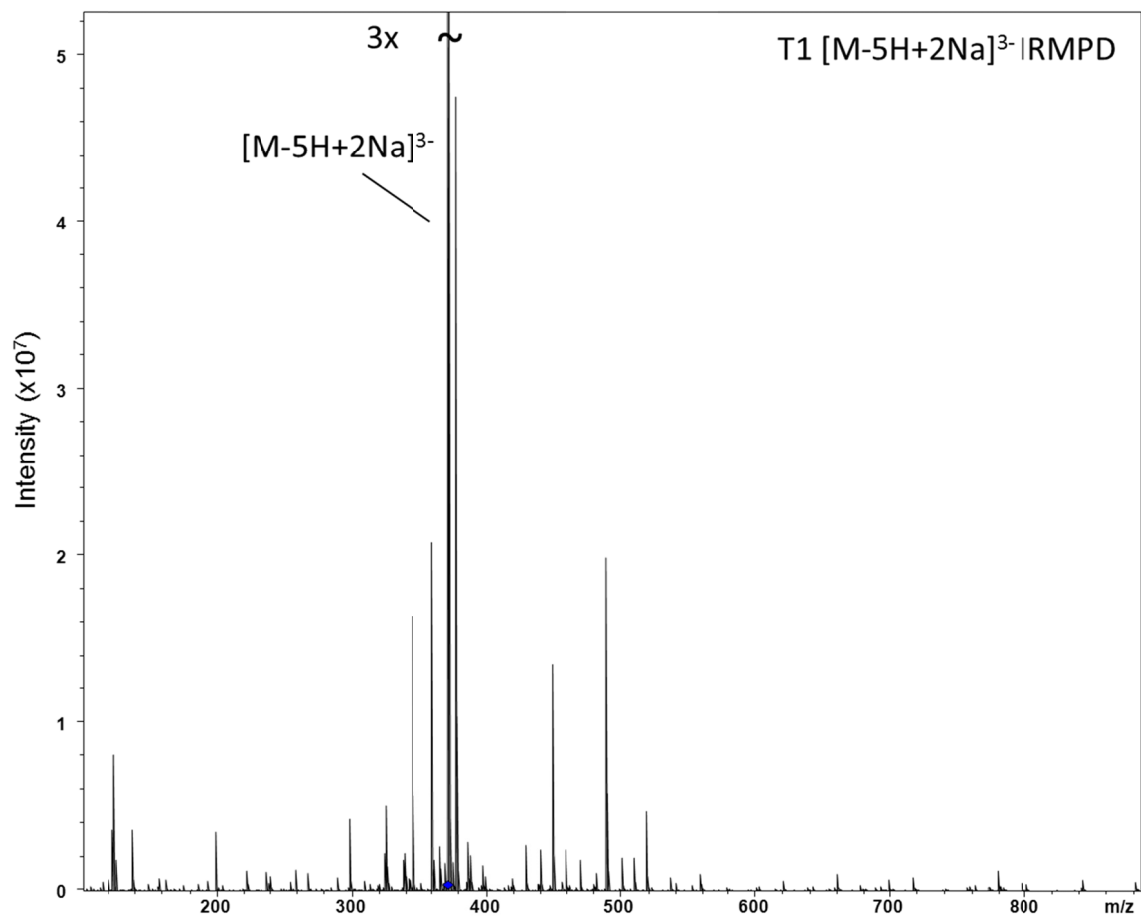

**Supplemental Figure 3.** EDD spectrum of T2  $[M-5H+2Na]^{3-}$ .

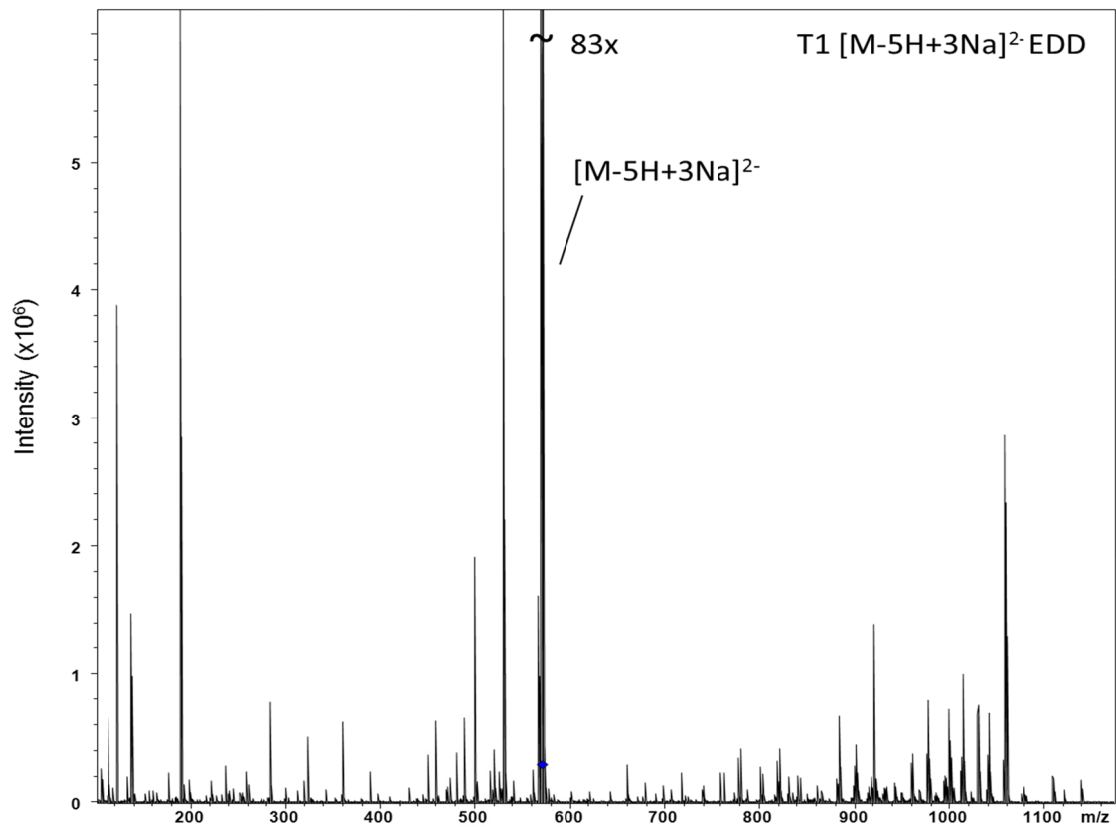

Supplemental Figure 4. IRMPD spectrum of T2  $[M-5H+2Na]^{3-}$ .

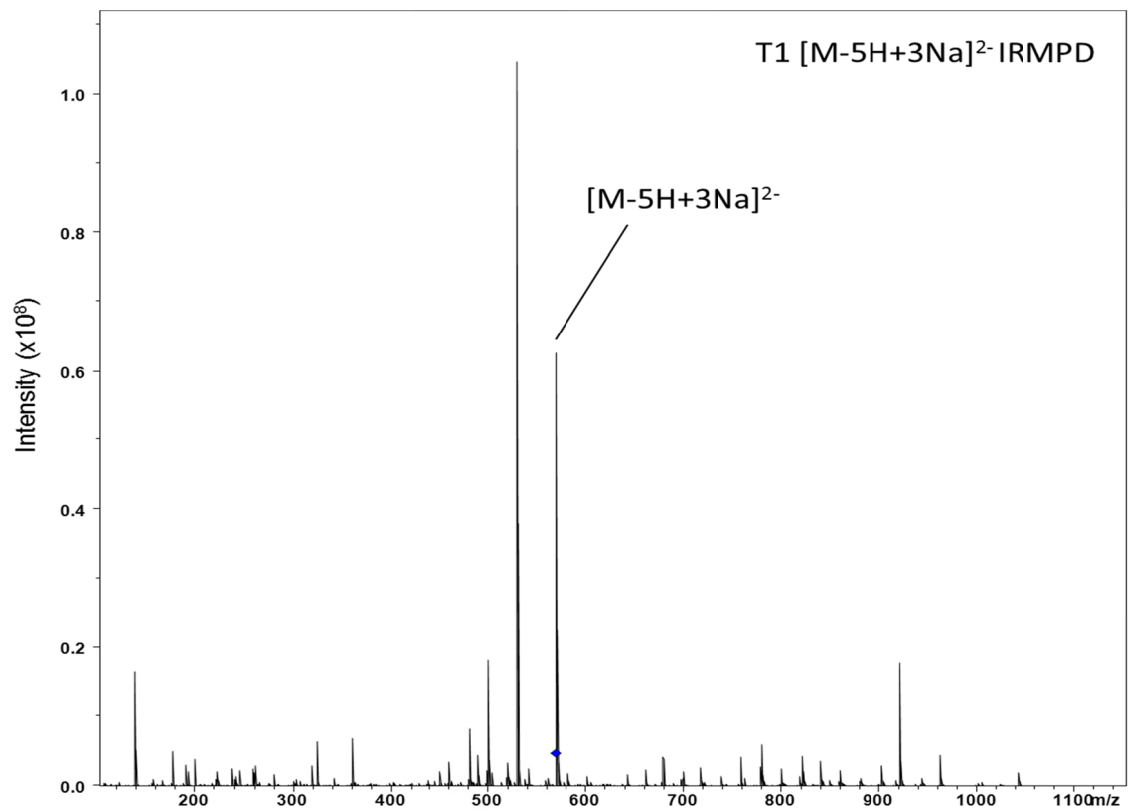

**Supplemental Figure 5.** EDD spectrum of T2  $[M-5H+3Na]^{2-}$ .

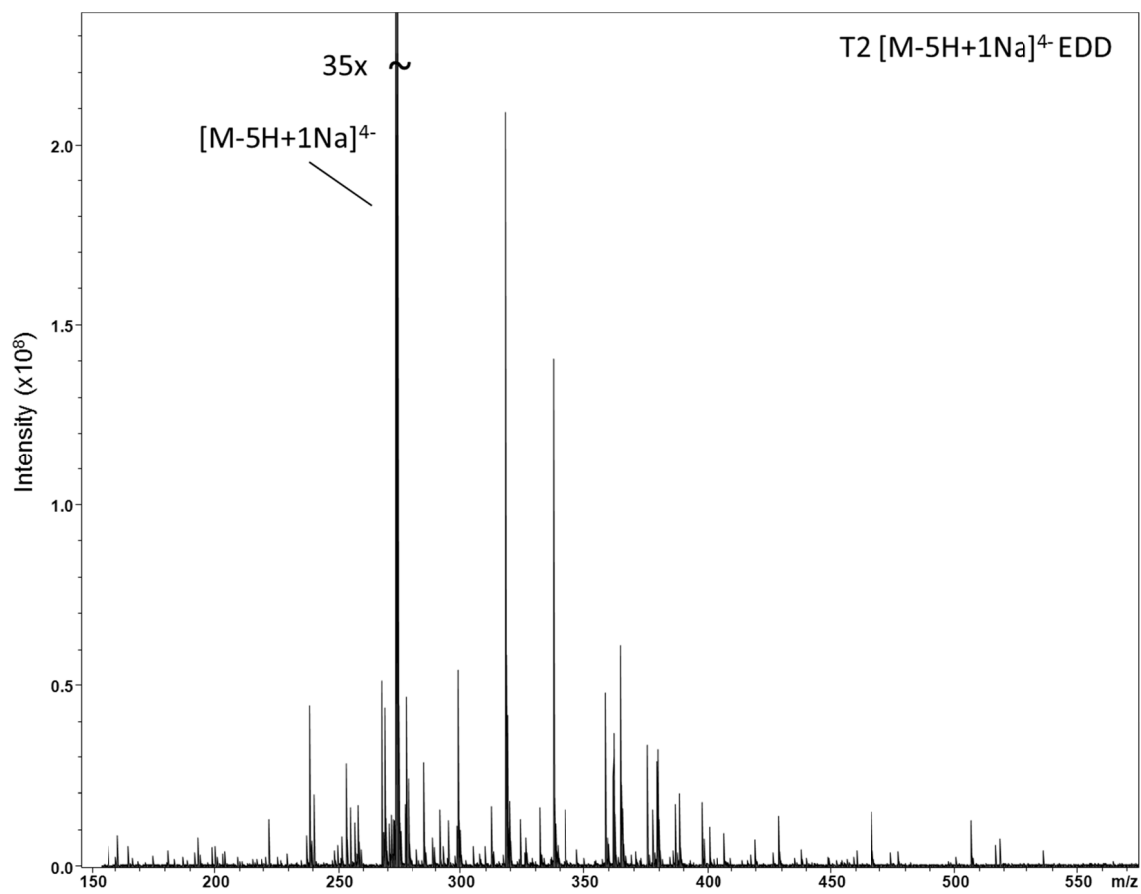

**Supplemental Figure 6.** IRMPD spectrum of T2  $[M-5H+3Na]^{2-}$ .

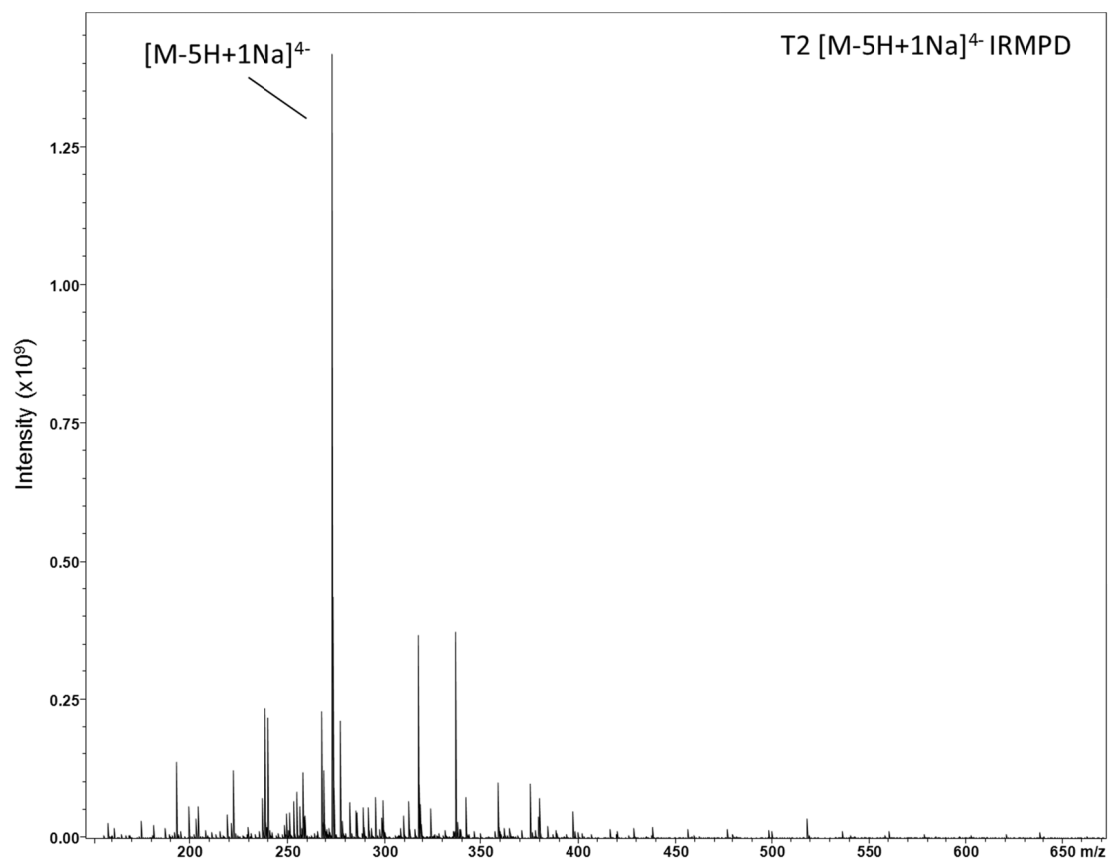

**Supplemental Table 1.** Assignment list for T1 EDD [M-5H+2Na]<sup>3-</sup>.

| <b>Mass to charge</b> | <b>Assignment</b> | <b>Intensity</b> |
|-----------------------|-------------------|------------------|
| 157.0145              | B1-SO3            | 396835           |
| 159.9688              | 0,2X1+Na          | 104742           |
| 168.9815              | 1,4X0             | 165041           |
| 175.025               | C1-SO3            | 214800           |
| 190.9635              | 1,4X0+Na          | 72573            |
| 208.9763              | 1,5A1             | 101303           |
| 228.9724              | 0,2A2+Na          | 46777            |
| 230.9581              | 1,5A1+Na          | 39992            |
| 236.9711              | B1                | 461972           |
| 238.4948              | B2-SO3            | 188129           |
| 240.0184              | Z1-SO3            | 463682           |
| 243.9898              | B3                | 76422            |
| 249.4857              | B2-SO3+Na         | 171559           |
| 254.9816              | C1                | 321708           |
| 258.029               | Y1-SO3            | 481996           |
| 258.491               | C2-SO3+Na         | 118248           |
| 258.491               | Z2+Na             | 118248           |
| 258.953               | B1+Na             | 536894           |
| 262.0004              | Z1-SO3+Na         | 65777            |
| 267.4964              | Y2+Na             | 265095           |
| 276.9636              | C1+Na             | 221575           |
| 279.496               | 2,4A3-SO3+Na      | 41636            |
| 289.4642              | B2+Na             | 164165           |
| 296.9919              | 2,4A2             | 45501            |
| 298.4693              | C2+Na             | 668513           |
| 298.6589              | 0,2A3+2Na         | 483850           |
| 299.9464              | 2,4X0+Na          | 50868            |
| 300.4549              | B2+2Na            | 143226           |
| 306.3202              | 0,2X3-SO3+2Na     | 51149            |
| 309.4601              | C2+2Na            | 190656           |
| 318.3378              | [M-5H+2Na]-2SO3   | 82040            |
| 318.9741              | 2,4A2+Na          | 623495           |
| 319.4746              | 2,4A3+Na          | 111848           |
| 321.9284              | 2,4X1+2Na         | 63868            |
| 325.3112              | 0,2A4+2Na         | 2121157          |
| 326.5113              | B3-SO3            | 65597            |
| 330.4653              | 2,4A3+2Na         | 67501            |
| 332.972               | 0,2X3+2Na         | 106712           |
| 333.472               | 3,5A3+Na          | 89223            |
| 337.5016              | B3-SO3+Na         | 293729           |
| 340.956               | 2,4A2+2Na         | 153622           |



|          |                |          |
|----------|----------------|----------|
| 341.957  | Z1+Na          | 289630   |
| 344.9902 | [M-5H+2Na]-SO3 | 4031306  |
| 346.5071 | C3-SO3+Na      | 95534    |
| 348.4924 | B3-SO3+2Na     | 55059    |
| 357.013  | 0,2A2-SO3      | 88667    |
| 357.4972 | C3-SO3+2Na     | 70974    |
| 359.9676 | Y1+Na          | 3008673  |
| 371.642  | [M-5H+2Na]     | 2.54E+08 |
| 377.48   | B3+Na          | 6400287  |
| 378.5026 | 2,4A4-SO3+Na   | 291591   |
| 378.9952 | 0,2A2-SO3+Na   | 250576   |
| 386.4853 | C3+Na          | 455087   |
| 387.9625 | 1,5X1+Na       | 698516   |
| 388.0089 | Y3-SO3+Na      | 127082   |
| 388.4709 | B3+2Na         | 430552   |
| 389.9945 | Z3-SO3+2Na     | 83345    |
| 397.4762 | C3+2Na         | 456490   |
| 398.9999 | Y3-SO3+2Na     | 267307   |
| 401.9783 | 0,2X1+Na       | 146455   |
| 408.5135 | 0,2A4-2SO3+2Na | 79750    |
| 412.9463 | 3,5A2+Na       | 132147   |
| 416.0502 | C2-2SO3        | 157832   |
| 416.0502 | Z2-SO3         | 157832   |
| 418.4813 | 2,4A4+2Na      | 420654   |
| 420.0215 | B2-2SO3+Na     | 185291   |
| 429.9728 | Z3+2Na         | 201159   |
| 438.032  | C2-2SO3+Na     | 252650   |
| 438.032  | Z2-SO3+Na      | 252650   |
| 438.9782 | Y3+2Na         | 101597   |
| 448.4919 | 0,2A4-SO3+2Na  | 3085258  |
| 456.0427 | Y2-SO3+Na      | 269774   |
| 458.9519 | 0,2A2+Na       | 999111   |
| 459.9833 | 0,2X3-SO3+2Na  | 83613    |
| 471.9839 | 1,5A2-SO3+Na   | 55612    |
| 480.9339 | 2,4A3-2SO3+Na  | 835446   |
| 480.9339 | 0,2A2+2Na      | 835446   |
| 484.0375 | 1,5X2-SO3+Na   | 66197    |
| 488.4704 | 0,2A4+2Na      | 2042376  |
| 494.9858 | 1,5A4-SO3+Na   | 106425   |
| 499.9786 | B2-SO3+Na      | 449297   |
| 514.0183 | Y2             | 53169    |
| 517.9899 | C2-SO3+Na      | 1088170  |
| 517.9899 | Z2+Na          | 1088170  |
| 521.9607 | B2-SO3+Na      | 90334    |
| 535.9997 | Y2+Na          | 1095966  |

|          |                |        |
|----------|----------------|--------|
| 539.9712 | C2-SO3+2Na     | 252326 |
| 539.9712 | Z2+2Na         | 252326 |
| 557.9822 | Y2+2Na         | 186986 |
| 560.0008 | 2,4A3-SO3+Na   | 96254  |
| 563.9948 | 1,5X2+Na       | 181140 |
| 581.981  | 2,4A3-SO3+2Na  | 68918  |
| 585.9769 | 1,5X2+2Na      | 41169  |
| 587.9944 | 3,5A3-SO3+Na   | 241132 |
| 597.9449 | C2+Na          | 115866 |
| 601.9167 | B2+2Na         | 73886  |
| 619.9288 | C2+2Na         | 216384 |
| 667.9516 | 3,5A3+Na       | 159748 |
| 676.0122 | B3-SO3+Na      | 105858 |
| 678.0563 | 2,4A4-2SO3+2Na | 144005 |
| 697.9923 | B3-SO3+2Na     | 158961 |
| 701.0414 | Z3-2SO3+2Na    | 61099  |
| 716.0038 | C3-SO3+2Na     | 219992 |
| 736.0315 | 2,4A4-SO3+Na   | 89983  |
| 758.0133 | 2,4A4-SO3+2Na  | 131751 |
| 777.9498 | B3+2Na         | 202292 |
| 780.996  | Z3-SO3+2Na     | 129160 |
| 795.9598 | C3+2Na         | 167666 |
| 815.9876 | 2,4A4+Na       | 75532  |
| 837.9715 | 2,4A4+2Na      | 82497  |
| 860.9527 | Z3+2Na         | 38664  |
| 897.9915 | 0,2A4-SO3+2Na  | 623776 |
| 911.0231 | 1,5A4-SO3+2Na  | 46424  |
| 977.9492 | 0,2A4+2Na      | 222468 |

**Supplemental Table 2.** Assignment list for T1 IRMPD  $[M-5H+2Na]^{3-}$ .

| <b>Mass to charge</b> | <b>Assignment</b> | <b>Intensity</b> |
|-----------------------|-------------------|------------------|
| 157.0141              | B1-SO3            | 282331           |
| 168.4891              | 1,4X0             | 151345           |
| 175.0247              | C1-SO3            | 324090           |
| 208.9761              | 1,5A1             | 86311            |
| 230.9579              | 1,5A1+Na          | 37156            |
| 236.971               | B1                | 1112796          |
| 240.0183              | Z1-SO3            | 824600           |
| 254.9816              | C1                | 518297           |
| 258.0289              | Y1-SO3            | 1237239          |
| 258.953               | B1+Na             | 687126           |
| 276.9633              | C1+Na             | 160779           |

|          |               |          |
|----------|---------------|----------|
| 296.9924 | 2,4A2         | 61685    |
| 299.947  | 2,4X0+Na      | 48240    |
| 318.338  | 2,4A2+Na      | 100593   |
| 341.9571 | Z1+Na         | 738805   |
| 359.9677 | Y1+Na         | 2.09E+07 |
| 401.9785 | 0,2X1+Na      | 85594    |
|          | 0,2A4-        |          |
| 408.5137 | 2SO3+2Na      | 116834   |
| 416.0505 | 3,5A2+Na      | 327721   |
| 416.0505 | C2-2SO3       | 327721   |
| 416.0505 | Z2-SO3        | 327721   |
| 420.022  | B2-2SO3+Na    | 301326   |
| 438.0324 | C2-2SO3+Na    | 404226   |
| 438.0324 | Z2-SO3+Na     | 404226   |
| 448.4922 | 0,2A4-SO3+2Na | 1.35E+07 |
| 456.0431 | Y2-SO3+Na     | 510704   |
| 458.9523 | 0,2A2+Na      | 2427837  |
| 459.9839 | 0,2A2+2Na     | 282862   |
| 459.9839 | 2,4A3-2SO3+Na | 282862   |
| 517.9895 | C2-SO3+Na     | 4743104  |
| 517.9895 | Z2+Na         | 4743104  |
| 521.9611 | B2-SO3+Na     | 211992   |
| 539.9712 | C2-SO3+2Na    | 484964   |
| 539.9712 | Z2+2Na        | 484964   |
| 581.9825 | 2,4A3-SO3+2Na | 69780    |
| 601.9179 | B2+2Na        | 256814   |
| 619.9286 | C2+2Na        | 620254   |
| 676.012  | B3-SO3+Na     | 306051   |
| 697.9935 | B3-SO3+2Na    | 658144   |
| 701.0399 | Z3-2SO3+2Na   | 129597   |
| 716.0046 | C3-SO3+2Na    | 825034   |
| 777.9502 | B3+2Na        | 1181595  |
| 795.9614 | C3+2Na        | 459297   |

**Supplemental Table 3.** Assignment list for T1 EDD [M-5H+3Na]<sup>2-</sup>.

| <b>Mass to charge</b> | <b>Assignment</b> | <b>Intensity</b> |
|-----------------------|-------------------|------------------|
| 157.0144              | B1-SO3            | 102844           |
| 236.9711              | B1                | 297045           |
| 240.0185              | Z1-SO3            | 101585           |
| 254.9816              | C1                | 52708            |
| 258.0289              | Y1-SO3            | 244188           |
| 258.9531              | B1+Na             | 186366           |
| 299.9465              | 2,4X0+Na          | 123418           |

|          |                     |          |
|----------|---------------------|----------|
| 318.9742 | 2,4A2+Na            | 182899   |
| 341.957  | Z1+Na               | 107125   |
| 359.9677 | Y1+Na               | 633143   |
| 387.9627 | 1,5X1+Na            | 249732   |
| 408.4671 | C3+3Na              | 56253    |
| 429.4728 | 2,4A4+3Na           | 121963   |
| 458.9523 | 0,2A2+Na            | 65351    |
| 459.4829 | 0,2A4-SO3+3Na       | 644672   |
| 470.9741 | 0,2X3-SO3+3Na       | 130126   |
| 480.9341 | 0,2A2+2Na           | 398615   |
| 489.0015 | [M-5H+3Na]-<br>2SO3 | 663773   |
| 499.4612 | 0,2A4+3Na           | 1929554  |
| 517.9898 | C2-2SO3+Na          | 107698   |
| 517.9898 | Z2+Na               | 107698   |
| 521.9595 | B2-SO3+Na           | 125404   |
| 528.9798 | [M-5H+3Na]-<br>SO3  | 1.85E+07 |
| 539.9711 | C2-SO3+2Na          | 178297   |
| 539.9711 | Z2+2Na              | 178297   |
| 568.9572 | [M-5H+3Na]          | 4.66E+08 |
| 574.0727 | B3-2SO3             | 69637    |
| 581.982  | 2,4A3-SO3+2Na       | 68381    |
| 601.9165 | B2+2Na              | 95144    |
| 619.9273 | C2+2Na              | 94622    |
| 641.9114 | C2+3Na              | 88755    |
| 678.0572 | 2,4A4-<br>2SO3+2Na  | 159513   |
| 689.9324 | 3,5A3+2Na           | 75908    |
| 697.9929 | B3-SO3+2Na          | 137132   |
| 716.0039 | C3-SO3+2Na          | 238591   |
| 719.975  | B3-SO3+3Na          | 62327    |
| 737.9863 | C3-SO3+3Na          | 110489   |
| 758.0135 | 2,4A4-SO3+2Na       | 239352   |
| 777.9503 | B3+2Na              | 358800   |
| 779.9959 | 2,4A4-SO3+3Na       | 421830   |
| 799.9317 | B3+3Na              | 287863   |
| 802.9803 | Z3-SO3+3Na          | 234074   |
| 817.9411 | C3+3Na              | 330363   |
| 820.9902 | Y3-SO3+3Na          | 424621   |
| 848.9847 | 1,5X3-SO3+3Na       | 78975    |
| 859.9527 | 2,4A4+3Na           | 142647   |
| 882.9364 | Z3+3Na              | 678431   |
| 900.9459 | Y3+3Na              | 452782   |
| 919.9737 | 0,2A4-SO3+3Na       | 1399915  |
| 933.0044 | 1,5A4-              | 129271   |

|           |               |         |
|-----------|---------------|---------|
|           | 2SO3+3Na      |         |
| 998.9475  | 1,3X3+3Na     | 734558  |
| 1012.9618 | 1,5A4-SO3+3Na | 1004778 |

**Supplemental Table 4.** Assignment list for T1 IRMPD  $[M-5H+3Na]^{2-}$ .

| <b>Mass to charge</b> | <b>Assignment</b>   | <b>Intensity</b> |
|-----------------------|---------------------|------------------|
| 157.0141              | B1-SO3              | 1034068          |
| 236.971               | B1                  | 2536377          |
| 240.0182              | Z1-SO3              | 1456490          |
| 254.9816              | C1                  | 152103           |
| 258.0289              | Y1-SO3              | 2525270          |
| 258.9529              | B1+Na               | 1923001          |
| 318.974               | 2,4A2+Na            | 2949576          |
| 341.9571              | Z1+Na               | 1080697          |
| 359.9678              | Y1+Na               | 6893068          |
| 408.467               | C3+3Na              | 292040           |
| 429.4725              | 2,4A4+3Na           | 436660           |
| 458.9523              | 0,2A2+Na            | 170506           |
| 459.4828              | 0,2A4-SO3+3Na       | 3510766          |
| 470.9741              | 0,2X3-SO3+3Na       | 500842           |
| 480.9342              | 0,2A2+2Na           | 8303582          |
| 489.002               | [M-5H+3Na]-<br>2SO3 | 4528610          |
| 499.4617              | 0,2A4+3Na           | 1.82E+07         |
| 510.9535              | 0,2X3+3Na           | 6.27E+04         |
| 517.9891              | C2-2SO3+Na          | 1219788          |
| 517.9891              | Z2+Na               | 1219788          |
| 521.9604              | B2-SO3+Na           | 772256           |
| 528.9797              | [M-5H+3Na]-SO3      | 1.05E+08         |
| 539.9706              | C2-SO3+2Na          | 2473787          |
| 539.9706              | Z2+2Na              | 2473787          |
| 568.9591              | [M-5H+3Na]          | 6.27E+07         |
| 581.9818              | 2,4A3-SO3+2Na       | 766054           |
| 601.9177              | B2+2Na              | 211454           |
| 619.9285              | C2+2Na              | 68789            |
| 641.9102              | C2+3Na              | 342435           |
| 678.0568              | 2,4A4-2SO3+2Na      | 4262703          |
| 697.9927              | B3-SO3+2Na          | 2092767          |
| 716.0045              | C3-SO3+2Na          | 2670661          |
| 719.975               | B3-SO3+3Na          | 612496           |
| 737.9863              | C3-SO3+3Na          | 1371535          |
| 758.0149              | 2,4A4-SO3+2Na       | 4243902          |
| 777.9504              | B3+2Na              | 2751249          |

|          |               |          |
|----------|---------------|----------|
| 779.9967 | 2,4A4-SO3+3Na | 6080427  |
| 799.9316 | B3+3Na        | 2493273  |
| 802.9799 | Z3-SO3+3Na    | 344374   |
| 820.989  | Y3-SO3+3Na    | 4390506  |
| 848.9854 | 1,5X3-SO3+3Na | 809915   |
| 859.9521 | 2,4A4+3Na     | 2236197  |
| 900.9475 | Y3+3Na        | 184437   |
| 919.9755 | 0,2A4-SO3+3Na | 1.77E+07 |

**Supplemental Table 5.** Assignment list for T2 EDD [M-5H+1Na]<sup>4+</sup>.

| <b>Mass to charge</b> | <b>Assignment</b> | <b>Intensity</b> |
|-----------------------|-------------------|------------------|
| 157.0142              | B1-SO3            | 5875684          |
| 159.9685              | 0,2X0             | 2829679          |
| 175.0248              | C1-SO3            | 3179816          |
| 208.976               | 1,5A2             | 2803316          |
| 236.971               | B1                | 8931601          |
| 238.4945              | B2-SO3            | 4.49E+07         |
| 240.0181              | Z1                | 2.01E+07         |
| 247.4994              | Z2                | 2005447          |
| 249.4854              | B2-SO3+Na         | 6366833          |
| 251.0094              | Y3-SO3            | 2586241          |
| 251.3171              | B3-SO3+Na         | 8599503          |
| 252.9952              | [M-5H+1Na]-SO3    | 2.87E+07         |
| 254.9814              | C1                | 1.65E+07         |
| 256.5053              | Y2                | 1.24E+07         |
| 258.0287              | Y1                | 1.72E+07         |
| 258.4908              | C2-SO3+Na         | 7055631          |
| 258.4908              | Z2+Na             | 7055631          |
| 258.9526              | B1+Na             | 5103257          |
| 267.4964              | Y2+Na             | 5.15E+07         |
| 270.5024              | 1,5X2             | 9006814          |
| 271.3244              | 2,4A4-SO3+Na      | 1.20E+07         |
| 272.9842              | [M-5H+1Na]        | 7.61E+09         |
| 276.6461              | C3                | 1810990          |
| 276.9633              | C1+Na             | 1.60E+07         |
| 277.056               | 0,2A2-SO3         | 1832615          |
| 277.9697              | B3+Na             | 2.46E+07         |
| 278.4727              | B2                | 6418101          |
| 278.9855              | Z3+Na             | 2623243          |
| 282.0284              | B2+0,2X3-2SO3     | 4.97E+06         |
| 283.9733              | C3+Na             | 2148350          |
| 284.989               | Y3+Na             | 2.88E+07         |

|          |                 |          |
|----------|-----------------|----------|
| 286.0236 | 1,5X1           | 4243123  |
| 288.5014 | 0,2X3+C3-2SO3   | 8.31E+06 |
| 289.4637 | B2+Na           | 5729569  |
| 291.3312 | 0,2A4+Na-SO3    | 1.60E+07 |
| 294.3212 | 1,5X3+Na        | 2741881  |
| 294.974  | Y2+C3+Na        | 1.32E+07 |
| 295.067  | 0,2A4+Y2-SO3    | 1.69E+07 |
| 298.4696 | C2+Na           | 1.15E+07 |
| 298.9927 | 0,2X3+Na-SO3    | 5.47E+07 |
| 301.9645 | B2+Z3           | 2.05E+06 |
| 307.4743 | C3+Y3+Na        | 3.32E+07 |
| 307.5206 | 0,2A3+Y3-SO3    | 3.93E+06 |
| 309.5062 | 0,2A4+Z3+Na-SO3 | 5.87E+06 |
| 317.9838 | 0,2A4+Na        | 2.10E+08 |
| 318.9739 | 2,4A2           | 1.09E+07 |
| 319.4741 | 2,4A3+Na        | 6162577  |
| 323.9464 | B2+Z3+Na        | 1.32E+07 |
| 328.0338 | Z3-2SO3         | 1.55E+06 |
| 328.48   | 2,4A4+Y3+Na     | 2.37E+06 |
| 333.4716 | 3,5A3           | 2807337  |
| 336.9847 | 2,4A4+Y2+Na     | 1.41E+08 |
| 337.5012 | B3-2SO3+Na      | 5603611  |
| 341.9573 | C2+Z3+Na        | 1.59E+07 |
| 341.9573 | B2+Y3+Na        | 1.59E+07 |
| 346.5071 | C3-2SO3+Na      | 5162066  |
| 349.4853 | 0,2A4+Z3+Na     | 2.67E+06 |
| 357.0141 | 0,2A2-SO3       | 2302914  |
| 358.4902 | 0,2A4+Y3+Na     | 4.87E+07 |
| 363.4829 | 1,5A3-SO3+Na    | 2819717  |
| 364.3156 | [M-5H+1Na]      | 6.19E+07 |
| 374.0241 | 0,2A4+Y2        | 3.40E+07 |
| 377.4802 | B3-SO3+Na       | 1.60E+07 |
| 378.9954 | 0,2A4+Z2+Na     | 2.92E+07 |
| 383.9681 | 2,4A4+Z2+Na     | 3.11E+06 |
| 385.4777 | C3"-SO3+Na      | 4.84E+06 |
| 386.4852 | C3-SO3+Na       | 1.74E+07 |
| 388.0095 | Y3-SO3+Na       | 2.03E+07 |
| 397.0061 | 0,2A4+Y2+Na     | 1.79E+07 |
| 398.0394 | B2-2SO3         | 7902932  |
| 401.9801 | 0,2X1+Na        | 1.44E+02 |
| 420.0224 | B2-SO3+Na       | 1.79E+06 |
| 437.5005 | 0,2A4+SO3+Na    | 5009506  |
| 438.033  | Z2-SO3+Na       | 2304060  |
| 438.033  | C2-2SO3+Na      | 2304060  |
| 458.9528 | 0,2A2+Na        | 2819384  |

|          |                 |          |
|----------|-----------------|----------|
| 466.0104 | [M-5H+1Na]-2SO3 | 1.54E+07 |
| 499.9778 | B2-SO3+Na       | 3079758  |
| 517.9891 | Z2+Na           | 8164487  |
| 517.9891 | C2-SO3+Na       | 8164487  |
| 535.9996 | Y2+Na           | 4851433  |

**Supplemental Table 6.** Assignment list for T2 IRMPD [M-5H+1Na]<sup>4+</sup>.

| <b>Mass to charge</b> | <b>Assignment</b> | <b>Intensity</b> |
|-----------------------|-------------------|------------------|
| 157.0142              | B1-SO3            | 2.76E+07         |
| 159.9686              | 0,2X0             | 5453812          |
| 175.0248              | C1-SO3            | 5945994          |
| 208.9762              | 1,5A2             | 5887199          |
| 217.0352              | 2,4A2-SO3         | 3732966          |
| 230.958               | 1,5A2+Na          | 9379930          |
| 236.971               | B1                | 7.27E+07         |
| 238.4945              | B2-SO3            | 2.35E+08         |
| 240.0183              | Z1                | 2.18E+08         |
| 247.4998              | Z2                | 6567858          |
| 247.4998              | B2-SO3+Na         | 6567858          |
| 251.0094              | Y3-SO3            | 9655881          |
| 251.3174              | B3-SO3+Na         | 4.67E+07         |
| 252.9951              | [M-5H+1Na]-SO3    | 6.70E+07         |
| 254.9815              | C1                | 8.35E+07         |
| 256.5052              | Y2                | 5.75E+07         |
| 257.3211              | C3-SO3+Na         | 3122238          |
| 258.0289              | Y1                | 1.19E+08         |
| 258.4909              | C2-SO3+Na         | 3.91E+07         |
| 258.4909              | Z2+Na             | 3.91E+07         |
| 258.9529              | B1+Na             | 4.15E+07         |
| 262.0003              | Z1+Na             | 5071776          |
| 267.4961              | Y2+Na             | 2.32E+08         |
| 270.5026              | 1,5X2             | 6101854          |
| 271.3244              | 2,4A4-SO3+Na      | 1.86E+07         |
| 272.9841              | [M-5H+1Na]        | 1.43E+09         |
| 276.6457              | C3                | 1997545          |
| 276.9635              | C1+Na             | 1.14E+08         |
| 277.0564              | 0,2A2-SO3         | 1.46E+07         |
| 277.9697              | B3+Na             | 3.26E+07         |
| 278.4728              | B2                | 1.01E+07         |
| 280.0109              | Y1+Na             | 1962248          |
| 283.9732              | C3+Na             | 2359447          |
| 284.9888              | Y3+Na             | 5.07E+07         |



|          |               |          |
|----------|---------------|----------|
| 289.4638 | B2+Na         | 2.10E+07 |
| 291.3314 | 0,2A4+Na-SO3  | 5.52E+07 |
| 294.3206 | 1,5X3+Na      | 1915628  |
| 296.9923 | 2,4A2         | 4661362  |
| 298.4693 | C2+Na         | 3.69E+07 |
| 298.9922 | 0,2X3+Na-SO3  | 6.80E+07 |
| 312.5131 | 1,5A2-SO3     | 3539757  |
| 317.9835 | 0,2A4+Na      | 3.70E+08 |
| 318.9742 | 2,4A2         | 2.76E+07 |
| 319.4746 | 2,4A3+Na      | 2.62E+07 |
| 323.5042 | 1,5A3-2SO3+Na | 3908828  |
| 328.0346 | Z3-2SO3       | 3064199  |
| 333.4719 | 3,5A3         | 2973538  |
| 337.5014 | B3-2SO3+Na    | 1.20E+07 |
| 346.5069 | C3-2SO3+Na    | 6101481  |
| 357.0136 | 0,2A2-SO3     | 1.22E+07 |
| 363.4821 | 1,5A3-SO3+Na  | 4743244  |
| 377.4797 | B3-SO3+Na     | 1.58E+07 |
| 378.9953 | 0,2A4+Z2+Na   | 3.95E+07 |
| 386.4848 | C3-SO3+Na     | 7514338  |
| 388.0084 | Y3-SO3+Na     | 1.58E+07 |
| 398.0401 | B2-2SO3       | 1.31E+07 |
| 401.9784 | 0,2X1+Na      | 9317717  |
| 416.0507 | Z2-SO3        | 1.76E+07 |
| 416.0507 | C2-2SO3       | 1.76E+07 |
| 420.0217 | B2-SO3+Na     | 1.36E+07 |
| 437.5011 | 0,2A4+SO3+Na  | 6398904  |
| 438.0324 | Z2-SO3+Na     | 2.02E+07 |
| 438.0324 | C2-2SO3+Na    | 2.02E+07 |
| 458.061  | 2,4A3-2SO3    | 3828315  |
| 458.9521 | 0,2A2+Na      | 6446910  |
| 499.979  | B2-SO3+Na     | 1.23E+07 |
| 517.9894 | Z2+Na         | 3.63E+07 |
| 517.9894 | C2-SO3+Na     | 3.63E+07 |
| 535.9999 | Y2+Na         | 1.34E+07 |
| 560.0002 | 2,4A3+Na-SO3  | 1.37E+07 |
